# Supplementary material for: Cytological and Molecular Characterization for Ploidy Determination in Yams (Dioscorea spp.)
Source: Preprints.org preprint supplement (doi:10.20944/preprints202107.0305.v1), 2021-07-13
Supplement: Supplementary file 2 [file supplementary]

## Sheet: Table S1
Table S1. Relative nuclear DNA content, chromosome counts, and ploidy level determined based on DArTseq genotyping data on 236 accessions representing eight Dioscorea spp.
S. No.	Accession	Species	Flow Cytometry			Chromosome No.	DArTseq-based ploidy
			G1 peak position of yam	G1 peak position of CRBC	PR
1	TDr-1489	D. rotundata	71.02	93.85	0.76	40	2X
2	TDr-1495	D. rotundata	70.3	98.21	0.72	40	2X
3	TDr-1499	D. rotundata	73.18	101.38	0.72	40	2X
4	TDr-1500	D. rotundata	100	100	1	60	3X
5	TDr-1509	D. rotundata	71.51	101.92	0.7	40	2X
6	TDr-1510	D. rotundata	71.81	97.15	0.74	40	2X
7	TDr-1513	D. rotundata	73	101.99	0.72	40	2X
8	TDr-1536	D. rotundata	73.64	99.76	0.74	40	2X
9	TDr-1559	D. rotundata	71.65	100.64	0.71	40	2X
10	TDr-1562	D. rotundata	72.65	103.33	0.7	40	2X
11	TDr-1568	D. rotundata	70.99	99.86	0.71	40	2X
12	TDr-1569	D. rotundata	73.21	103.07	0.71	40	2X
13	TDr-1585b	D. rotundata	55.94	105.02	0.53	40	2X
14	TDr-1598	D. rotundata	100	100	1	60	3X
15	TDr-1601	D. rotundata	73.84	104.13	0.71	40	2X
16	TDr-1622	D. rotundata	69.99	97.95	0.71	40	2X
17	TDr-1628	D. rotundata	72.21	99.49	0.73	40	2X
18	TDr-1631	D. rotundata	73.62	10.53	0.72	40	2X
19	TDr-1655	D. rotundata	69.62	95.95	0.73	40	2X
20	TDr-1657	D. rotundata	70.72	98.48	0.72	40	2X
21	TDr-1663	D. rotundata	73.98	103.51	0.71	40	2X
22	TDr-1669	D. rotundata	71.76	100.6	0.71	40	2X
23	TDr-1672	D. rotundata	75.15	100.92	0.74	40	2X
24	TDr-1676	D. rotundata	73.67	99.67	0.74	40	2X
25	TDr-1684	D. rotundata	71.98	102.23	0.7	40	2X
26	TDr-1686	D. rotundata	72.48	101.91	0.71	40	2X
27	TDr-1688	D. rotundata	71.2	101	0.7	40	2X
28	TDr-1707	D. rotundata	69.87	97.13	0.72	40	2X
29	TDr-1709	D. rotundata	71.74	99.47	0.72	40	2X
30	TDr-1711	D. rotundata	74.52	102.45	0.73	40	2X
31	TDr-1723a	D. rotundata	100	100	1	40	2X
32	TDr-1734	D. rotundata	73.74	100.64	0.73	40	2X
33	TDr-1760	D. rotundata	71.76	97.69	0.73	40	2X
34	TDr-1762	D. rotundata	71	99.75	0.71	40	2X
35	TDr-1764	D. rotundata	71.04	94.92	0.75	40	2X
36	TDr-1765	D. rotundata	72.67	101.11	0.72	40	2X
37	TDr-1769	D. rotundata	71.31	100	0.71	40	2X
38	TDr-1772	D. rotundata	72.59	102	0.71	40	2X
39	TDr-1775	D. rotundata	100	100	1	60	3X
40	TDr-1799	D. rotundata	72.75	99.97	0.73	40	2X
41	TDr-1813	D. rotundata	70.04	99.15	0.71	40	2X
42	TDr-1818	D. rotundata	68.97	98.31	0.7	40	2X
43	TDr-1825	D. rotundata	58.5	101.39	0.58	40	2X
44	TDr-1828	D. rotundata	68.51	96.61	0.71	40	2X
45	TDr-1829	D. rotundata	72.17	98.86	0.73	40	2X
46	TDr-1839	D. rotundata	73.69	103.38	0.71	40	2X
47	TDr-1852	D. rotundata	100	100	1	60	3X
48	TDr-1858	D. rotundata	72.03	99.21	0.73	40	2X
49	TDr-1881	D. rotundata	72.13	101.14	0.71	40	2X
50	TDr-1888	D. rotundata	70.33	99.22	0.71	40	2X
51	TDr-1905	D. rotundata	75.44	102.7	0.73	40	2X
52	TDr-1907	D. rotundata	71.63	101.96	0.7	40	2X
53	TDr-1913	D. rotundata	72.66	103.96	0.7	40	2X
54	TDr-1922b	D. rotundata	70.96	97.44	0.73	60	3X
55	TDr-1937	D. rotundata	72.26	101.72	0.71	40	2X
56	TDr-1939	D. rotundata	70.4	100.35	0.7	40	2X
57	TDr-1943	D. rotundata	71.2	100.38	0.71	40	2X
58	TDr-1949	D. rotundata	72.32	101.5	0.71	40	2X
59	TDr-1953	D. rotundata	71.71	98.03	0.73	40	2X
60	TDr-1956	D. rotundata	71.19	98.85	0.72	40	2X
61	TDr-1966	D. rotundata	74.33	102.45	0.73	40	2X
62	TDr-2000	D. rotundata	69.42	99.5	0.7	40	2X
63	TDr-2009	D. rotundata	67.95	95.58	0.71	40	2X
64	TDr-2015	D. rotundata	100	100	1	60	3X
65	TDr-2017	D. rotundata	70.35	100.85	0.7	40	2X
66	TDr-2018	D. rotundata	72.73	102.46	0.71	40	2X
67	TDr-2028	D. rotundata	100	100	1	60	3X
68	TDr-2033	D. rotundata	62.78	94.42	0.66	40	2X
69	TDr-2034	D. rotundata	100	100	1	60	3X
70	TDr-2040	D. rotundata	73.14	100.47	0.73	40	2X
71	TDr-2050	D. rotundata	100	100	1	60	3X
72	TDr-2071	D. rotundata	100	100	1	60	3X
73	TDr-2084	D. rotundata	72.5	100.75	0.72	40	2X
74	TDr-2126	D. rotundata	75.38	104	0.72	40	2X
75	TDr-2167	D. rotundata	100	100	1	60	3X
76	TDr-2266	D. rotundata	73.01	99.4	0.74	40	2X
77	TDr-2269	D. rotundata	69.83	99.94	0.7	40	2X
78	TDr-2291	D. rotundata	70.64	97.27	0.73	40	2X
79	TDr-2348	D. rotundata	71.49	98.96	0.72	40	2X
80	TDr-2363	D. rotundata	73.44	103.4	0.71	40	2X
81	TDr-2439	D. rotundata	71.47	99.02	0.72	40	2X
82	TDr-2564	D. rotundata	64.58	86.43	0.75	40	2X
83	TDr-2572	D. rotundata	71.28	100.18	0.71	40	2X
84	TDr-2575	D. rotundata	69.27	98.29	0.7	40	2X
85	TDr-2582	D. rotundata	74.3	103.42	0.72	40	2X
86	TDr-2664	D. rotundata	100	100	1	60	3X
87	TDr-2678	D. rotundata	70.11	101.98	0.7	unknown	2X
88	TDr-2688	D. rotundata	100	100	1	60	3X
89	TDr-2701	D. rotundata	73.62	103.49	0.71	40	2X
90	TDr-2763	D. rotundata	69.46	96.55	0.72	40	2X
91	TDr-2916	D. rotundata	71.5	97.94	0.73	40	2X
92	TDr-2946	D. rotundata	52.22	80.22	0.65	40	2X
93	TDr-2968	D. rotundata	73.64	102.32	0.72	40	2X
94	TDr-2974	D. rotundata	100	100	1	60	3X
95	TDr-3287	D. rotundata	70.96	97.33	0.73	40	2X
96	TDr-3296	D. rotundata	69.37	97.27	0.71	40	2X
97	TDr-3310	D. rotundata	72.09	101.27	0.71	40	2X
98	TDr-3320	D. rotundata	72.82	100.13	0.73	40	2X
99	TDr-3374	D. rotundata	71.03	100.2	0.71	40	2X
100	TDr-3402	D. rotundata	72.61	100.82	0.72	40	2X
101	TDr-3430	D. rotundata	70.98	100.31	0.71	40	2X
102	TDr-3466	D. rotundata	70.4	97.94	0.73	40	2X
103	TDr-3472	D. rotundata	70.17	98.19	0.71	40	2X
104	TDr-3497	D. rotundata	73.99	104.74	0.71	40	2X
105	TDr-3519	D. rotundata	100	100	1	60	3X
106	TDr-3524	D. rotundata	73.06	101.76	0.72	40	2X
107	TDr-3551	D. rotundata	72.48	101.15	0.72	40	2X
108	TDr-3567	D. rotundata	71.08	97.74	0.73	40	2X
109	TDr-3592	D. rotundata	100	100	1	60	3X
110	TDr-3643	D. rotundata	69.12	95.75	0.72	40	2X
111	TDr-3671a	D. rotundata	100	100	1	40	2X
112	TDr-3719	D. rotundata	67.78	90.96	0.75	40	2X
113	TDr-3721	D. rotundata	72.61	100.19	0.72	40	2X
114	TDr-3870	D. rotundata	74.76	104	0.72	40	2X
115	TDr-3882	D. rotundata	71.99	101.64	0.71	40	2X
116	TDr-4084	D. rotundata	70.79	98.7	0.72	40	2X
117	TDr-4307	D. rotundata	76.38	103.77	0.74	40	2X
118	TDr-4379	D. rotundata	73.77	103.61	0.71	40	2X
119	TDr-89/02665	D. rotundata	68.1	95.55	0.71	40	2X
1	TDa-1001	D. alata	58.06	100.6	0.58	40	2X
2	TDa-1008	D. alata	86.92	98.95	0.88	60	3X
3	TDa-1009	D. alata	52.06	95.46	0.55	40	2X
4	TDa-1010	D. alata	36.83	89.96	0.41	40	2X
5	TDa-1014a	D. alata	100	100	1	unknown	2X
6	TDa-1017	D. alata	56.7	98.4	0.58	40	2X
7	TDa-1020	D. alata	68.85	83	0.83	60	3X
8	TDa-1027	D. alata	56.57	95.56	0.59	40	2X
9	TDa-1030	D. alata	85	98	0.87	60	3X
10	TDa-1033	D. alata	58.02	100.41	0.6	40	2X
11	TDa-1036	D. alata	112.69	98.06	1.15	80	4X
12	TDa-1043	D. alata	54.02	93.62	0.58	40	2X
13	TDa-1056	D. alata	52.87	97.67	0.54	40	2X
14	TDa-1062	D. alata	82.92	100.73	0.82	60	3X
15	TDa-1063	D. alata	57.86	100.01	0.58	40	2X
16	TDa-1066	D. alata	54.82	94.71	0.58	40	2X
17	TDa-1078	D. alata	58.92	100.33	0.59	40	2X
18	TDa-1079b	D. alata	41.96	82.84	0.51	40	2X
19	TDa-1083b	D. alata	52.69	99.61	0.53	40	2X
20	TDa-1085	D. alata	56.85	101.9	0.56	40	2X
21	TDa-1092	D. alata	56.92	98.08	0.58	40	2X
22	TDa-1096	D. alata	57.42	99.53	0.58	40	2X
23	TDa-11/00010	D. alata	58.08	101.74	0.57	40	2X
24	TDa-1104	D. alata	112.01	99.01	1.13	80	4X
25	TDa-1122	D. alata	60.12	99.94	0.6	40	2X
26	TDa-1124	D. alata	85.03	99.89	0.85	60	3X
27	TDa-1125	D. alata	55.15	96.88	0.57	40	2X
28	TDa-1137	D. alata	118.12	99.23	1.19	80	4X
29	TDa-1142	D. alata	56.6	97.01	0.58	40	2X
30	TDa-1143	D. alata	50.74	88.4	0.57	40	2X
31	TDa-1145b	D. alata	51.2	99.26	0.52	40	2X
32	TDa-1167	D. alata	59.54	99.54	0.6	40	2X
33	TDa-1176	D. alata	59.63	102.41	0.58	40	2X
34	TDa-1177a	D. alata	87.24	98.69	0.88	40	2X
35	TDa-1187b	D. alata	95.65	196.9	0.49	40	2X
36	TDa-1189a	D. alata	50.01	97.06	0.51	80	4X
37	TDa-1196	D. alata	62.75	102.24	0.61	40	2X
38	TDa-1207	D. alata	56.47	93.99	0.6	40	2X
39	TDa-1217b	D. alata	47.48	96.25	0.49	40	2X
40	TDa-1221	D. alata	59.65	101.62	0.59	40	2X
41	TDa-1236	D. alata	57.28	100.92	0.57	40	2X
42	TDa-1240b	D. alata	48.39	95.65	0.51	40	2X
43	TDa-1244	D. alata	60.2	105.19	0.57	40	2X
44	TDa-1253	D. alata	57.79	101.79	0.57	40	2X
45	TDa-1258	D. alata	54.7	97.93	0.56	40	2X
46	TDa-1270	D. alata	57.15	95.91	0.6	40	2X
47	TDa-1277b	D. alata	52.78	106.31	0.5	40	2X
48	TDa-1282	D. alata	79.27	99.3	0.8	60	3X
49	TDa-1285	D. alata	112.98	99.57	1.13	80	4X
50	TDa-1287	D. alata	56.6	93.4	0.61	40	2X
51	TDa-1290	D. alata	57.71	99	0.58	40	2X
52	TDa-1299	D. alata	58.21	99.1	0.59	40	2X
53	TDa-1315	D. alata	58.23	100.8	0.58	40	2X
54	TDa-1316	D. alata	48.91	88.66	0.55	40	2X
55	TDa-1319b	D. alata	100	100	1	80	4X
56	TDa-1328	D. alata	56.14	99.01	0.57	40	2X
57	TDa-1347	D. alata	58.21	98.32	0.59	40	2X
58	TDa-1351	D. alata	86.44	99.4	0.87	60	3X
59	TDa-1359	D. alata	32.79	69.26	0.47	40	2X
60	TDa-1361	D. alata	109.87	95.79	1.15	80	4X
61	TDa-1365	D. alata	59.01	101.14	0.58	40	2X
62	TDa-1375	D. alata	53.08	93.83	0.57	40	2X
63	TDa-1404	D. alata	56.99	99.19	0.57	40	2X
64	TDa-1425	D. alata	84.36	99.15	0.85	60	3X
65	TDa-1432	D. alata	57.73	98.95	0.58	40	2X
66	TDa-1439b	D. alata	50.49	100.83	0.5	40	2X
67	TDa-1448	D. alata	57.93	101.34	0.57	40	2X
68	TDa-1449	D. alata	84.04	98.59	0.85	60	3X
69	TDa-1459	D. alata	54.82	91.47	0.6	40	2X
70	TDa-1471b	D. alata	40.9	85.18	0.48	40	2X
71	TDa-2861b	D. alata	48.81	98.21	0.5	40	2X
72	TDa-3236	D. alata	81.68	95.61	0.85	60	3X
73	TDa-3271b	D. alata	46.45	90.45	0.51	40	2X
74	TDa-3902	D. alata	57.41	96.78	0.59	40	2X
75	TDa-3903	D. alata	84.6	97.18	0.87	60	3X
76	TDa-3914	D. alata	57.66	97.32	0.59	40	2X
77	TDa-3918	D. alata	57.92	97.25	0.6	40	2X
78	TDa-4042	D. alata	56.48	98.06	0.58	40	2X
79	TDa-4326	D. alata	44.67	91.26	0.49	40	2X
80	TDa-4335b	D. alata	51.75	97.37	0.53	40	2X
81	TDa-4346b	D. alata	51.13	101.87	0.5	40	2X
82	TDa-4635	D. alata	58.5	105.24	0.56	40	2X
1	TDc-2808	D. cayenensis	100	100	1	60	3X
2	TDc-3897	D. cayenensis	100	100	1	60	3X
3	TDc-2798	D. cayenensis	133.76	97.1	1.38	80	4X
4	TDc-2816	D. cayenensis	135.75	101.7	1.33	80	4X
1	TDd-3909	D. dumetorum	35.68	106.91	0.33	40	2X
2	TDd-3100	D. dumetorum	51.15	102.98	0.5	60	3X
3	TDd-3778	D. dumetorum	52.58	103.16	0.51	60	3X
4	TDd-3806	D. dumetorum	50.54	99.66	0.51	60	3X
5	TDd-3947	D. dumetorum	51.08	102.12	0.5	60	3X
6	TDd-4118	D. dumetorum	53.57	108.27	0.49	60	3X
1	TDes-2786	D. esculenta	117.65	100.71	1.17	80	4X
2	TDes-3034	D. esculenta	116.7	100.34	1.16	80	4X
3	TDes-3038b	D. esculenta	100	100	1	80	4X
1	TDb-3029	D. bulbifera	123.91	97.72	1.27	60	3X
2	TDb-3045	D. bulbifera	121.41	97.69	1.24	60	3X
3	TDb-3046	D. bulbifera	122.63	96.8	1.27	60	3X
4	TDb-3049	D. bulbifera	124.8	99.2	1.26	60	3X
5	TDb-3050	D. bulbifera	121.48	97.25	1.25	60	3X
6	TDb-3060	D. bulbifera	127.65	100.18	1.27	60	3X
7	TDb-3084	D. bulbifera	133	100	1.33	60	3X
8	TDb-3085	D. bulbifera	122.89	98.06	1.25	60	3X
9	TDb-3431	D. bulbifera	124.63	97.17	1.28	60	3X
10	TDb-3688	D. bulbifera	120.71	94.71	1.27	60	3X
11	TDb-3692b	D. bulbifera	70.86	97.28	0.73	60	3X
12	TDb-3693	D. bulbifera	124.32	103.21	1.2	60	3X
13	TDb-3773	D. bulbifera	119.98	95.87	1.25	60	3X
14	TDb-3835	D. bulbifera	123.48	96.61	1.28	60	3X
15	TDb-4119	D. bulbifera	129.82	99.79	1.3	60	3X
16	TDb-4121	D. bulbifera	121.96	95.36	1.28	60	3X
1	TDab-3847	D. abyssinica	71.03	97.11	0.73	40	Unknown
2	TDab-3902	D. abyssinica	67.94	94.56	0.72	40	Unknown
3	TDab-3857	D. abyssinica	72.11	101.26	0.71	40	Unknown
4	TDab-3881	D. abyssinica	70.28	95.98	0.73	40	Unknown
5	TDab-3884	D. abyssinica	64.05	94.92	0.67	40	Unknown
1	TDpr-1021	D. praehensilis	72.54	91.88	0.79	40	Unknown
Channel number PR = Yam/CRBC G1 peak ratio; CRBC = chicken red blood cells; a Accessions showing discrepencies between chromosome counting, DArTseq and flow cytometry; b Accessions that can be used as internal reference stendards in flow cytometry
